# Supplementary material for: Selective hydrogenation of α-pinene to cis-pinane over Ru nanocatalysts in aqueous micellar nanoreactors
Source: Royal Society of Chemistry journal article supplement (doi:10.1039/c6ra13099b), 2016-01-01
Supplement: c6ra13099b1.pdf [file c6ra13099b1.pdf]

# Selective Hydrogenation of $\alpha$ -Pinene to Cis-pinane over Ru Nanocatalysts in Aqueous Micellar Nanoreactors

Shengli Hou,<sup>a</sup> Congxia Xie,<sup>\*a</sup> Fengli Yu,<sup>a</sup> Bing Yuan<sup>a</sup> and Shitao Yu<sup>b</sup>

<sup>a</sup>State Key Laboratory Base of Eco-chemical Engineering, College of Chemistry and Molecular Engineering, Qingdao University of Science and Technology, Qingdao, 266042, China. E-mail: xiecongxia@126.com; Fax: +86 532 8402 3927; Tel: +86 532 8402 3927

<sup>b</sup>College of Chemical Engineering, Qingdao University of Science and Technology, Qingdao, 266042, China.

## Supporting Information

### CONTENTS

|                                                                                         |   |
|-----------------------------------------------------------------------------------------|---|
| S1. Experimental.....                                                                   | 2 |
| S1.1 Materials.....                                                                     | 2 |
| S1.2 Preparation of Ru(0) nanoparticles.....                                            | 2 |
| S1.3 Hydrogenation of $\alpha$ -pinene.....                                             | 2 |
| S1.4 Characterization methods.....                                                      | 2 |
| S2. XPS Measurement.....                                                                | 3 |
| S3. Impact of various metal precursors.....                                             | 3 |
| S4. TEM Measurement and XRD measurement.....                                            | 4 |
| S5. TEM images and particle size distributions.....                                     | 5 |
| S6. Appearance of the reaction.....                                                     | 6 |
| S7. CLSM Images.....                                                                    | 6 |
| S8. Hydrogenation of $\alpha$ -pinene over Ru(0) nanoparticles in D <sub>2</sub> O..... | 6 |
| S9. Additional data.....                                                                | 7 |

## S1. Experimental

### S1.1 Materials

$\alpha$ -Pinene (purity: 97%) was supplied by Jiangxi Hesse (China) Chemicals Co. Ltd.  $\text{RuCl}_3$ ,  $\text{PdCl}_2$ ,  $\text{RhCl}_3$  and  $\text{PtCl}_4$  were supplied by CIVI-Chem (China) Industrial Corporation.  $\text{Pd/C}$  (10% Pd) was purchased from Aladdin (China) Industrial Corporation. Ethyl acetate (purity: AR) was purchased from Sinopharm (China) Chemical Reagent Co. Ltd. TPGS-1000 was purchased from Aladdin (China) Industrial Corporation. 0.5% TPGS-1000/ $\text{H}_2\text{O}$  (weight ratio) solution was prepared by dissolving 0.5 g TPGS-750-M in 100 g water. TPGS-750-M and SPGS-550-M (2% W/W solution in water) was purchased from Sigma-Aldrich (Shanghai) Trading Co. Ltd.  $\text{H}_2$  (purity  $\geq 99.9\%$ ) was supplied by Qingdao (China) Heli Co. Ltd. Water was double distilled and deionized before use. Other reagents were of analytical-grade purity and without further purification.

### S1.2 Preparation of Ru(0) nanoparticles

In a typical experiment, 2 mL 0.5% TPGS-1000/  $\text{H}_2\text{O}$  (weight ratio) and 2.0 mg  $\text{RuCl}_3$  were placed in a stainless steel reactor. The mixture was stirred for 10 min at 25 °C. The reactor was then sealed, and purged with  $\text{H}_2$  to remove air. Subsequently, the reactor was pressurized to 0.5 MPa  $\text{H}_2$ , and placed in a 50 °C water bath. After stirring for 1 h, the reactor was cooled to ambient temperature and vented. A homogeneous dark solution of the catalyst was obtained and could be used directly for the hydrogenation of  $\alpha$ -pinene. We measured the valence state of the obtained Ru(0) nanoparticles, with the results indicating that Ru(III) was reduced to Ru(0) (Fig S1). Pd(0), Rh(0) and Pt(0) nanoparticles were prepared using the same procedure, and their metal precursors were  $\text{PdCl}_2$ ,  $\text{RhCl}_3$  and  $\text{PtCl}_4$ , respectively. Their TEM images and XRD spectra were shown in Fig S2.

### S1.3 Hydrogenation of $\alpha$ -pinene

In a typical experiment, 0.2730 g of  $\alpha$ -pinene was added to the catalytic system as described in section S1.2. The reactor was sealed and purged with  $\text{H}_2$  to remove air. Then the reactor was pressurized to 0.5 MPa  $\text{H}_2$  and placed in a 50 °C water bath, the mixture was stirred for 1.5 h. After the reaction, the remaining products were isolated by liquid-liquid extraction with *ethyl acetate* ( $5 \times 0.5$  mL). The *ethyl acetate* layer was then removed via syringe, and the combined extracts were analyzed using gas chromatography (GC). For the recycling procedure, a small aliquot was removed using a pipette from the reaction mixture after the final extraction to ensure the product and any starting materials were removed as completely as possible. Without the addition of fresh surfactant or  $\text{RuCl}_3$  and  $\text{Na}_2\text{CO}_3$ , the  $\alpha$ -pinene (0.2730 g) charged into the autoclave with the remaining aqueous solution for subsequent recycling.

### S1.4 Characterization methods

The particle sizes and shapes of the Ru nanoparticles were measured by transmission electron microscopy (TEM, Hitachi-7650). The specimens were prepared by placing a drop of the catalyst on a copper grid and then evaporating the solvent. The particle diameters were measured from the enlarged TEM photographs. A particle size distribution histogram was obtained on the basis of the measurements of about 400 particles.

The valence of Ru nanoparticles was tested by X-ray photoelectron spectroscopy (XPS, Kratos Axis Ultra DLD). The amount of Ru leaching during the reaction was measured by inductively coupled plasma-atomic emission spectrometry (ICP-AES, Prodigy XP, Leeman). The mean diameter of the micelles containing Ru nanoparticles was determined by dynamic light scattering (DLS, Nano ZS90, Malvern). The structure of the obtained metal nanoparticles was determined by X-ray diffraction (XRD, Enraf Noius CAD4). The conversion and selectivity were measured in a gas chromatography (GC, GC9790, Fuli) equipped with a flame ionization detector (FID) detector and an OV 1701 (50 m, 0.25 mm i.d.) column. The zeta potential of the micelles containing Ru nanoparticles was characterized by a Zetasizer Nano ZS90 instrument (pH=4.0, 25 °C).

## S2. XPS Measurement

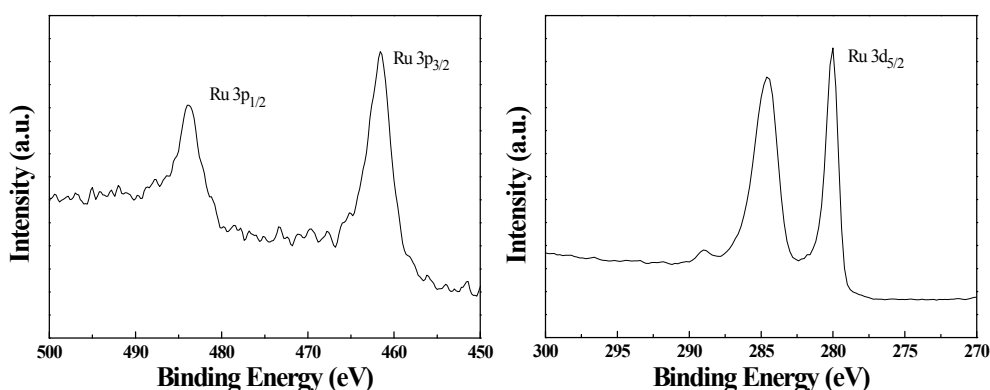

Fig. S1 XPS spectra of Ru nanoparticles

## S3. Impact of various metal precursors

Table S1 Impact of nano-metals on the conversion of  $\alpha$ -pinene

| <div style="text-align: center;"> </div> |                                    |                        |                        |                          |                                     |    |                    |                       |                                 |
|------------------------------------------|------------------------------------|------------------------|------------------------|--------------------------|-------------------------------------|----|--------------------|-----------------------|---------------------------------|
| Metal                                    | Average Diameter (nm) <sup>a</sup> | Structure <sup>b</sup> | Conv. (%) <sup>c</sup> | Select. (%) <sup>d</sup> | TOF (h <sup>-1</sup> ) <sup>e</sup> | d% | Atomic radius (nm) | Lattice constant (nm) | Electronic configuration        |
| Ru(0)                                    | 2.47 ± 0.07                        | <i>hcp</i>             | 61.3                   | 99.2                     | 81.7                                | 50 | 0.134              | 0.271                 | 4d <sup>7</sup> 5s <sup>1</sup> |
| Rh(0)                                    | 2.64 ± 0.14                        | <i>fcc</i>             | 67.0                   | 96.1                     | 89.3                                | 50 | 0.134              | 0.380                 | 4d <sup>8</sup> 5s <sup>1</sup> |
| Pd(0)                                    | 2.57 ± 0.06                        | <i>fcc</i>             | 59.2                   | 92.1                     | 78.9                                | 46 | 0.137              | 0.389                 | 4d <sup>10</sup>                |
| Pt(0)                                    | 2.23 ± 0.05                        | <i>fcc</i>             | 65.3                   | 94.5                     | 87.1                                | 44 | 0.138              | 0.392                 | 5d <sup>9</sup> 6s <sup>1</sup> |

<sup>a</sup> Measured using TEM, The results represent error margin of 95% confidential intervals. <sup>b</sup> Measured using XRD. The images of TEM and XRD were presented in Fig. S2. <sup>c</sup> Determined by GC. <sup>d</sup> Selectivity: The percentage of cis-pinane in the

product. <sup>e</sup> Turnover frequency defined as number of mol of converted substrate per mol of catalyst per hour.

#### S4. TEM Measurement and XRD measurement

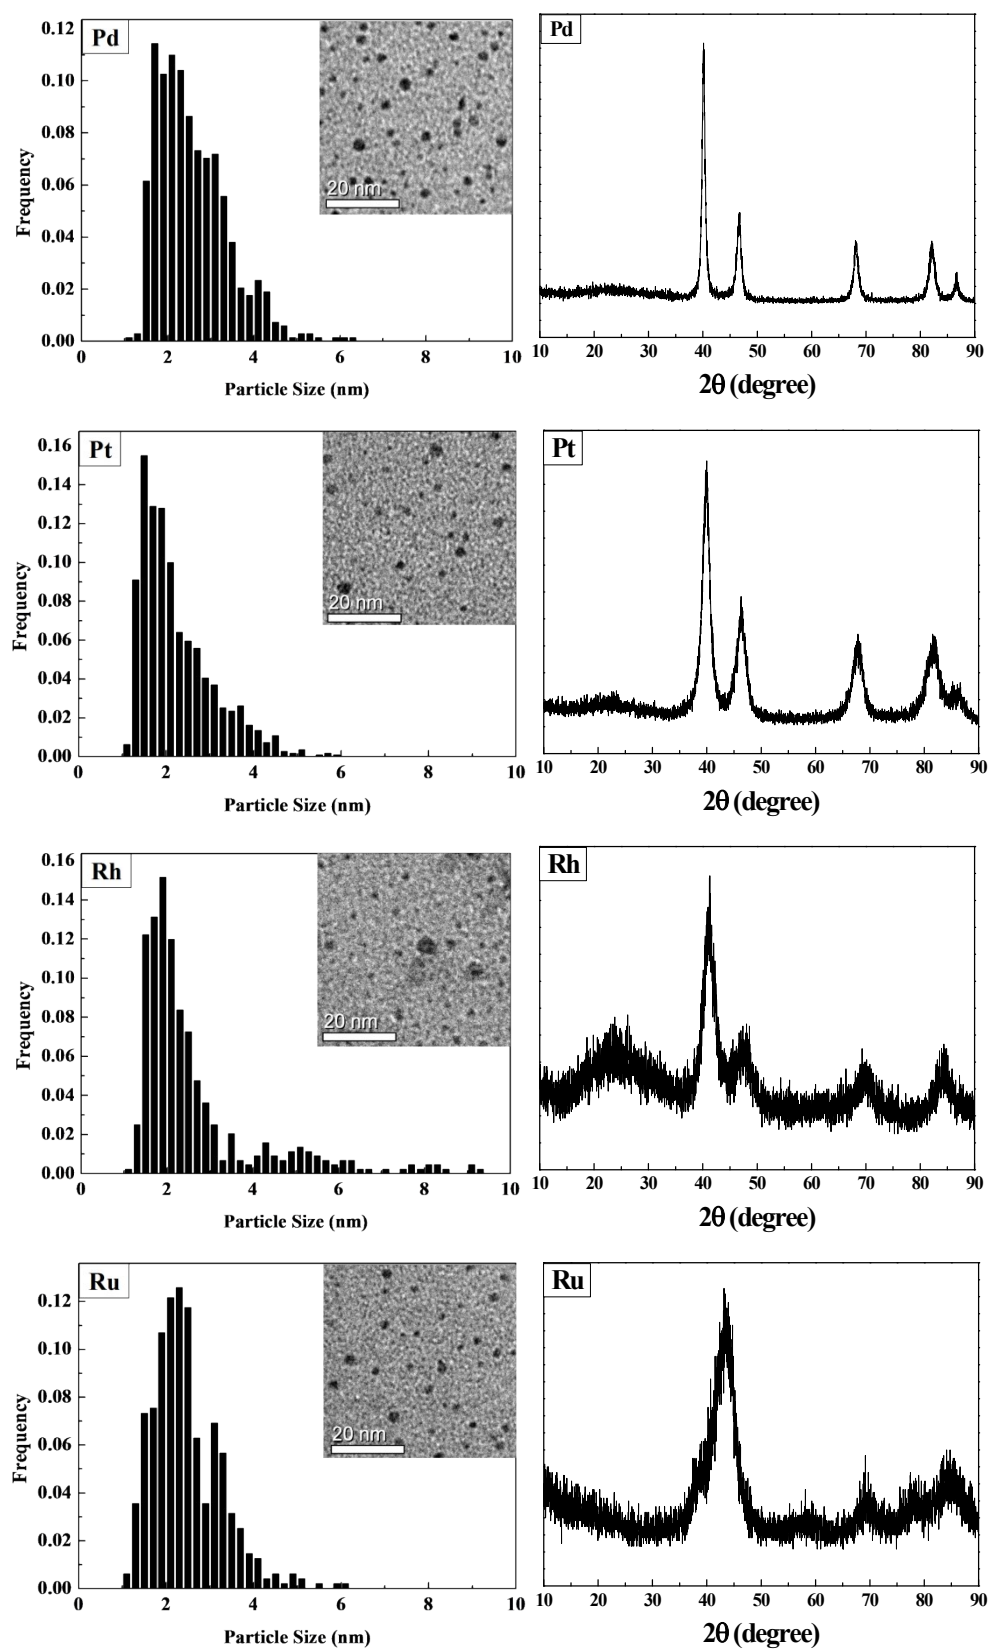

Fig. S2 XRD spectra, TEM images and particle size distributions in various nanoparticles

## S5. TEM images and particle size distributions

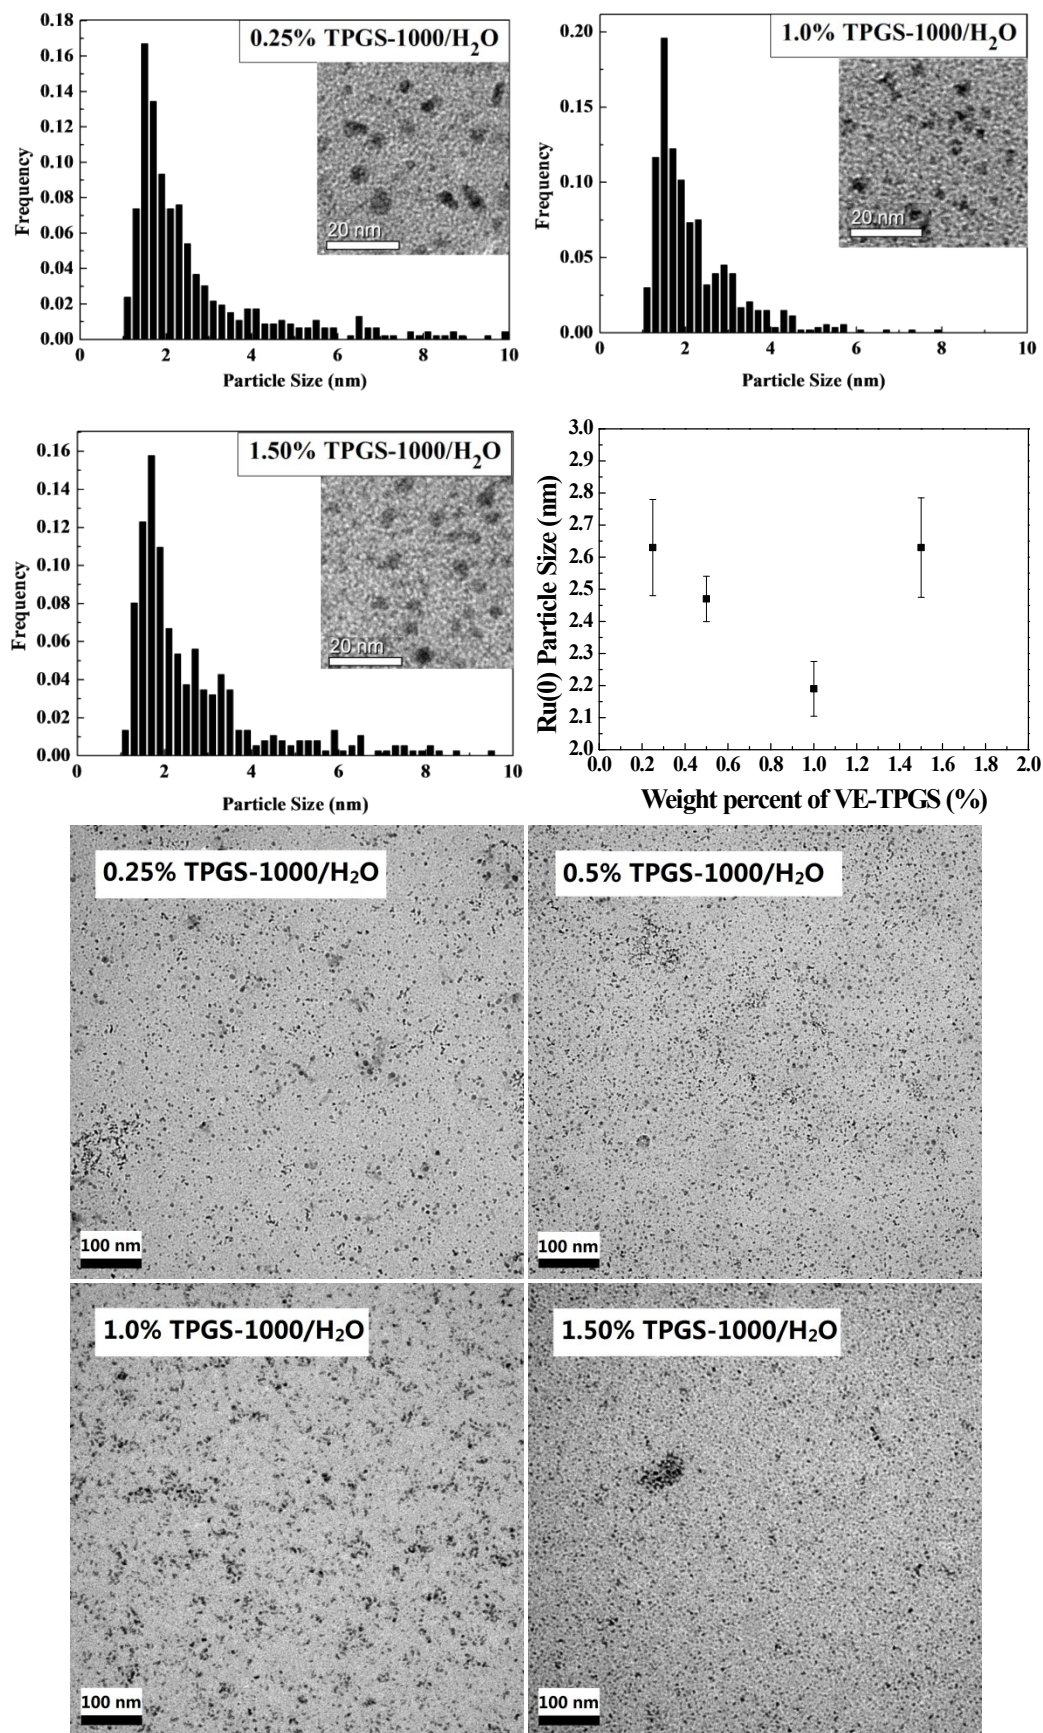

**Fig. S3** TEM images and particle size distributions of Ru(0) in various weight percent of TPGS-1000. The error bars represent error margin of 95% confidential intervals.

## S6. Appearance of the reaction

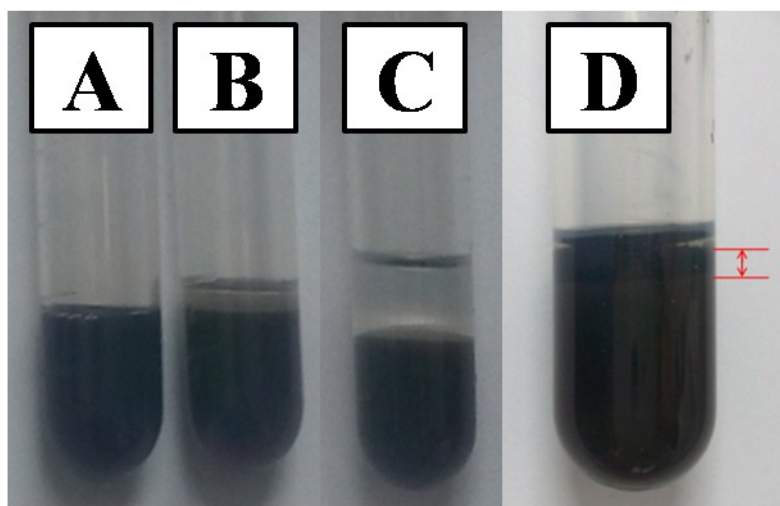

**Fig. S4** Photographs of catalyst Ru(0) under the reaction conditions. A) Ru(0) nanoparticles in 0.5% TPGS-1000 solution. B) After reaction completion. C) Extraction with *ethyl acetate*. D) After reaction completion (without Na<sub>2</sub>CO<sub>3</sub>). Ru(0) nanoparticles were aggregated into clumps on the upper of the aqueous phase.

## S7. CLSM Images

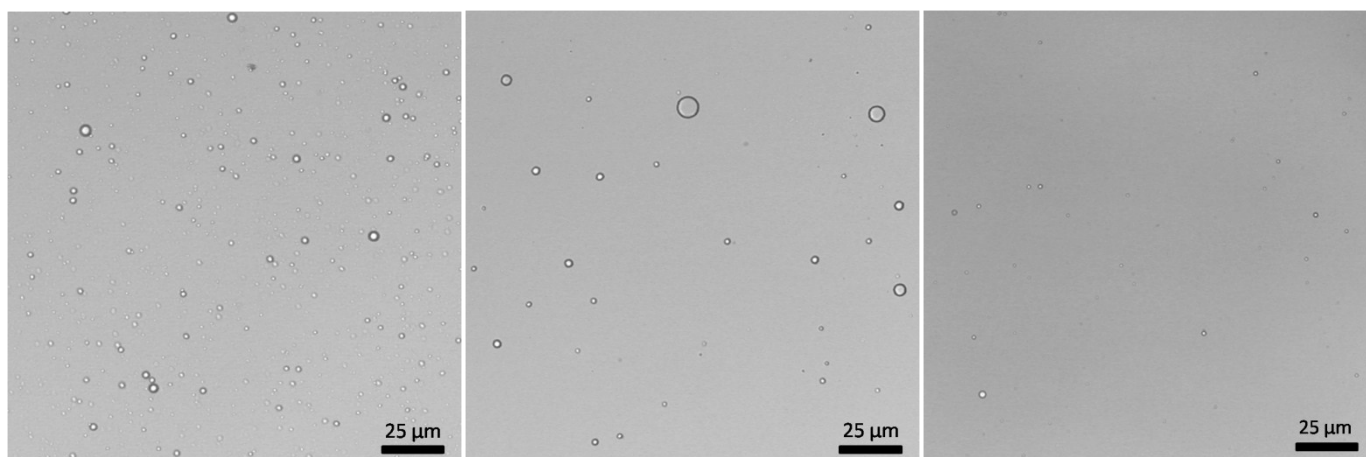

**Fig. S5** Images of  $\alpha$ -pinene dispersed in the catalyst phase under the reaction conditions. Left) Added Na<sub>2</sub>CO<sub>3</sub> in the hydrogenation reaction,  $\alpha$ -pinene dispersed evenly in the semi-homogeneous catalyst. Medially) Without Na<sub>2</sub>CO<sub>3</sub> in the hydrogenation reaction. Right) The catalyst phase after extraction with *ethyl acetate*.

## S8. Hydrogenation of $\alpha$ -pinene over Ru(0) nanoparticles in D<sub>2</sub>O

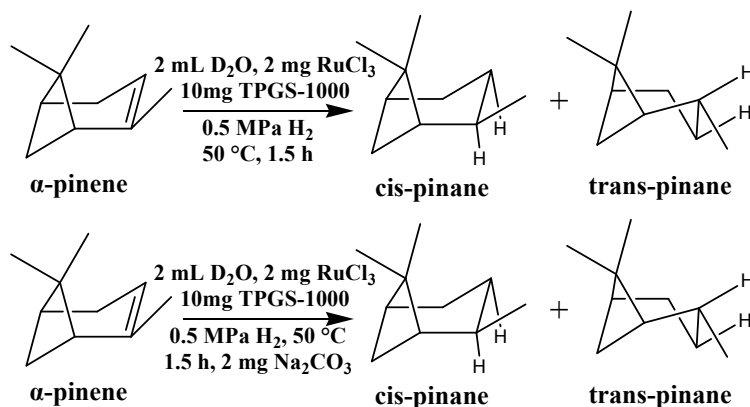

**Scheme S1** Hydrogenation of  $\alpha$ -pinene over Ru(0) nanoparticles in D<sub>2</sub>O



## S9. Additional data

**Table S2** The data of contrast experiments under some special conditions <sup>a</sup>

| Entry          | Ru(0)<br>(mmol) | Na <sub>2</sub> CO <sub>3</sub><br>(mg) | H <sub>2</sub> O<br>(mL) <sup>b</sup> | <i>n</i> -Heptane<br>(mL) <sup>b</sup> | Ethyl acetate<br>(mL) <sup>b</sup> | H <sub>2</sub><br>(MPa) | Temperature<br><sup>e</sup><br>(°C) | Time<br>(h) | Conv<br>(%) <sup>c</sup> | Select.<br>(%) <sup>d</sup> |
|----------------|-----------------|-----------------------------------------|---------------------------------------|----------------------------------------|------------------------------------|-------------------------|-------------------------------------|-------------|--------------------------|-----------------------------|
| 1              | 0.01            | 2.0                                     | 1                                     | 0                                      | 0                                  | 0.5                     | 50                                  | 1.5         | 98.9                     | 98.7                        |
| 2              | 0.01            | 2.0                                     | 0                                     | 1                                      | 0                                  | 0.5                     | 50                                  | 1.5         | 61.8                     | 98.1                        |
| 3              | 0.01            | 2.0                                     | 0                                     | 0                                      | 1                                  | 0.5                     | 50                                  | 1.5         | 99.1                     | 98.7                        |
| 4              | 0               | 2.0                                     | 0                                     | 0                                      | 0                                  | 0.5                     | 50                                  | 1.5         | 0                        | -                           |
| 5              | 0               | 2.0                                     | 0                                     | 0                                      | 1                                  | 0.5                     | 50                                  | 1.5         | 0                        | -                           |
| 6 <sup>e</sup> | 0.01            | 2.0                                     | 0                                     | 0                                      | 0                                  | 0.5 (N <sub>2</sub> )   | 50                                  | 1.5         | 0                        | -                           |
| 7 <sup>e</sup> | 0.01            | 2.0                                     | 0                                     | 0                                      | 1                                  | 0.5 (N <sub>2</sub> )   | 50                                  | 1.5         | 0                        | -                           |
| 8              | 0.01            | 2.0                                     | 0                                     | 0                                      | 0                                  | 0.5                     | 50                                  | 1.4         | 98.0                     | 98.6                        |
| 9              | 0.01            | 2.0                                     | 0                                     | 0                                      | 0                                  | 0.5                     | 45                                  | 1.5         | 95.2                     | 98.7                        |
| 10             | 0.01            | 2.0                                     | 0                                     | 0                                      | 0                                  | 0.4                     | 50                                  | 1.5         | 97.3                     | 98.5                        |

<sup>a</sup> Reaction conditions: substrate (2 mmol), catalyst (0.01mmol). 2 mL TPGS-1000/H<sub>2</sub>O (0.5%) <sup>b</sup> Placed in the reactor with  $\alpha$ -pinene. <sup>c</sup> Determined by GC. <sup>d</sup> Selectivity: The percentage of cis-pinane in the product. <sup>e</sup> H<sub>2</sub> was replaced with N<sub>2</sub>.

When 1.0 mL excess water (entry 1) or ethyl acetate (entry 3) was added to the prepared catalytic system, the conversion of  $\alpha$ -pinene decreased slightly. But the conversion decreased 37.9% with 1.0 mL excess *n*-heptane (entry 2) was added. These results indicate that *n*-heptane affected the catalytic activity. So we chose ethyl acetate as the extraction. We also draw the conclusion that Ru(0) was the sole catalyst (entries 4,5). The aqueous medium and ethyl acetate played no role in providing H<sub>2</sub> (entries 6,7), suggesting that the both hydrogen atoms took place in the lipophilic core between the metal and the hydrogen-containing micelles. Experiment results (entries 8,9,10) showed that reaction conditions were not necessary to increased or decreased.
